# Supplementary material for: Prediction of Protein Function from Tertiary Structure of the Active Site in Heme Proteins by Convolutional Neural Network
Source: Biomolecules. 2023 Jan 9;13(1):137. doi: 10.3390/biom13010137 (PMC9855806; doi:10.3390/biom13010137)
Supplement: Supplementary file 1 [file biomolecules-13-00137-s001.zip › pdbid_function_list.csv]

pdbid	heme_chain_id	heme_resSeq	function1	function2	function3
19hc	A	301	0	0	1
19hc	A	302	0	0	1
19hc	A	303	0	0	1
19hc	A	304	0	0	1
19hc	A	305	0	0	1
19hc	A	306	0	0	1
19hc	A	307	0	0	1
19hc	A	308	0	0	1
19hc	A	309	0	0	1
1a00	B	147	0	1	0
1a01	B	147	0	1	0
1a3o	A	142	0	1	0
1awp	A	201	0	0	1
1b80	A	350	1	0	0
1bab	A	143	0	1	0
1bgp	A	400	1	0	0
1bva	A	390	1	0	0
1bzz	A	142	0	1	0
1c52	A	200	0	0	1
1c6r	A	90	0	0	1
1c75	A	93	0	0	1
1c7c	B	147	0	1	0
1ccr	A	112	0	0	1
1cg5	A	142	0	1	0
1cg5	B	142	0	1	0
1cgo	A	128	0	0	1
1ch1	A	154	0	1	0
1ch2	A	154	0	1	0
1ch3	A	154	0	1	0
1ch7	A	154	0	1	0
1ch9	A	154	0	1	0
1chh	A	104	0	0	1
1chi	A	104	0	0	1
1chj	A	104	0	0	1
1ci3	M	254	0	0	1
1cie	A	104	0	0	1
1cif	A	104	0	0	1
1cig	A	104	0	0	1
1cih	A	104	0	0	1
1cik	A	154	0	1	0
1cio	A	154	0	1	0
1co6	A	108	0	0	1
1co8	A	154	0	1	0
1co9	A	154	0	1	0
1cot	A	130	0	0	1
1cp0	A	154	0	1	0
1cpq	A	130	0	0	1
1cqx	A	404	1	0	0
1crg	A	104	0	0	1
1crh	A	104	0	0	1
1cri	A	104	0	0	1
1csu	A	104	0	0	1
1csv	A	104	0	0	1
1csw	A	104	0	0	1
1csx	A	104	0	0	1
1ctj	A	91	0	0	1
1ctz	A	104	0	0	1
1cxc	A	125	0	0	1
1cxy	A	204	0	0	1
1cyj	A	200	0	0	1
1cyo	A	201	0	0	1
1d0c	A	500	1	0	0
1d7c	A	401	1	0	0
1dgf	A	3000	1	0	0
1dlw	A	144	0	1	0
1dm1	A	148	0	1	0
1do3	A	154	0	1	0
1dti	A	154	0	1	0
1duw	A	293	0	0	1
1duw	A	294	0	0	1
1duw	A	295	0	0	1
1duw	A	296	0	0	1
1duw	A	297	0	0	1
1duw	A	298	0	0	1
1duw	A	299	0	0	1
1duw	A	300	0	0	1
1duw	A	301	0	0	1
1dw0	A	113	0	0	1
1dxd	A	154	0	1	0
1dxv	B	147	0	1	0
1e29	A	201	0	0	1
1e2v	A	900	0	0	1
1e2w	A	900	0	0	1
1eue	A	201	0	0	1
1fcs	A	155	0	1	0
1fhj	A	142	0	1	0
1fhj	B	147	0	1	0
1fj0	A	115	0	0	1
1flp	A	143	0	1	0
1ft5	A	213	0	0	1
1ft5	A	214	0	0	1
1ft5	A	215	0	0	1
1ft5	A	216	0	0	1
1gbu	B	148	0	1	0
1gbv	B	147	0	1	0
1gcv	A	141	0	1	0
1gcv	B	137	0	1	0
1gdj	A	154	0	1	0
1gdv	A	101	0	0	1
1gq1	A	601	1	0	0
1gqa	A	131	0	0	1
1gu2	A	125	0	0	1
1gwe	A	504	1	0	0
1gwi	A	1414	1	0	0
1gwt	A	350	1	0	0
1gwu	A	1306	1	0	0
1gyo	A	111	0	0	1
1gyo	A	112	0	0	1
1gyo	A	113	0	0	1
1gyo	A	114	0	0	1
1h32	B	1139	0	0	1
1h97	A	148	0	1	0
1hcz	A	253	0	0	1
1hh5	A	69	0	0	1
1hh5	A	70	0	0	1
1hh5	A	71	0	0	1
1hrm	A	154	0	1	0
1hsr	A	345	1	0	0
1hsy	A	154	0	1	0
1i77	A	108	0	0	1
1i77	A	109	0	0	1
1i77	A	110	0	0	1
1i77	A	111	0	0	1
1ibe	A	143	0	1	0
1icc	A	201	0	0	1
1io7	A	1401	1	0	0
1iqc	A	401	1	0	0
1iqc	A	402	1	0	0
1irv	A	104	0	0	1
1irw	A	104	0	0	1
1it2	A	147	0	1	0
1iw0	A	901	1	0	0
1iyn	A	296	1	0	0
1j0o	A	1004	0	0	1
1j0o	A	1002	0	0	1
1j0o	A	1001	0	0	1
1j0o	A	1003	0	0	1
1j0p	A	1004	0	0	1
1j0p	A	1002	0	0	1
1j0p	A	1001	0	0	1
1j0p	A	1003	0	0	1
1j77	A	300	1	0	0
1jdl	A	500	0	0	1
1jdr	A	296	1	0	0
1jf3	A	148	0	1	0
1jf4	A	148	0	1	0
1jfb	A	501	1	0	0
1jmx	A	1001	0	0	1
1jmx	A	1002	0	0	1
1jni	A	125	1	0	0
1jni	A	126	1	0	0
1jzm	A	147	0	1	0
1kb0	A	802	1	0	0
1kfr	A	148	0	1	0
1kqf	C	809	0	0	1
1kqf	C	810	0	0	1
1krj	A	296	1	0	0
1kv9	A	901	1	0	0
1kzm	A	350	1	0	0
1lfk	A	430	1	0	0
1lhs	A	155	0	1	0
1lj0	A	201	0	0	1
1llp	A	350	1	0	0
1lqx	A	201	0	0	1
1lr6	A	201	0	0	1
1ls9	A	92	0	0	1
1lue	A	154	1	1	0
1lyc	A	344	1	0	0
1m1q	A	801	0	0	1
1m1q	A	804	0	0	1
1m1q	A	802	0	0	1
1m1q	A	803	0	0	1
1m20	A	201	0	0	1
1m2i	A	201	0	0	1
1m2m	A	201	0	0	1
1m59	A	201	0	0	1
1m6m	A	154	0	1	0
1m70	A	199	0	0	1
1m70	A	200	0	0	1
1m7s	A	600	1	0	0
1m7v	A	901	1	0	0
1m85	A	1001	1	0	0
1mba	A	148	0	1	0
1mgn	A	154	0	1	0
1mj4	A	502	1	0	0
1mkr	A	296	1	0	0
1mlg	A	154	0	1	0
1mll	A	154	0	1	0
1mlo	A	154	0	1	0
1mls	A	154	0	1	0
1mn2	A	396	1	0	0
1mod	A	154	0	1	0
1mqv	A	150	0	0	1
1mti	A	154	0	1	0
1mtj	A	154	0	1	0
1myg	A	154	0	1	0
1myh	A	155	0	1	0
1myi	A	154	0	1	0
1myj	A	155	0	1	0
1myt	A	154	0	1	0
1mz4	A	151	0	0	1
1n45	A	300	1	0	0
1n5u	A	605	1	0	0
1n97	A	602	1	0	0
1ns9	A	142	0	1	0
1ns9	B	147	0	1	0
1nz2	A	154	1	1	0
1nz3	A	154	1	1	0
1o16	A	154	1	1	0
1o1j	B	147	0	1	0
1o1l	A	284	0	1	0
1o1m	A	286	0	1	0
1o1m	B	147	0	1	0
1o1n	A	286	0	1	0
1o1o	A	150	0	1	0
1o1o	B	150	0	1	0
1o1p	B	147	0	1	0
1obm	A	154	0	1	0
1ofj	A	154	0	1	0
1ofk	A	154	1	1	0
1ofw	A	1294	0	0	1
1ofw	A	1295	0	0	1
1ofw	A	1296	0	0	1
1ofw	A	1297	0	0	1
1ofw	A	1298	0	0	1
1ofw	A	1299	0	0	1
1ofw	A	1300	0	0	1
1ofw	A	1301	0	0	1
1ofw	A	1302	0	0	1
1oj6	A	1150	0	1	0
1os6	A	72	0	0	1
1os6	A	73	0	0	1
1os6	A	74	0	0	1
1pa2	A	306	1	0	0
1pby	A	991	1	0	0
1pby	A	992	1	0	0
1pl3	A	401	1	0	0
1po5	A	500	1	0	0
1q1f	A	200	0	1	0
1q4g	B	1601	1	0	0
1q5d	A	440	1	0	0
1qdb	A	516	1	0	0
1qdb	A	517	1	0	0
1qdb	A	518	1	0	0
1qdb	A	519	1	0	0
1qgj	A	1350	1	0	0
1qks	A	601	1	0	0
1qpw	A	650	0	1	0
1qpw	D	950	0	1	0
1qwl	B	550	1	0	0
1r1y	A	143	0	1	0
1r9o	A	500	1	0	0
1raq	A	104	0	0	1
1rse	A	154	0	1	0
1rwj	A	90	0	0	1
1rwj	A	91	0	0	1
1rwj	A	92	0	0	1
1s6v	A	296	1	0	0
1s6v	B	104	0	0	1
1sk7	A	300	1	0	0
1sox	A	502	1	0	0
1stq	A	600	1	0	0
1sy7	A	1883	1	0	0
1t93	A	430	1	0	0
1u5u	A	999	1	0	0
1u9m	A	90	0	0	1
1u9u	A	90	0	0	1
1ued	A	1430	1	0	0
1up9	A	201	0	0	1
1up9	A	202	0	0	1
1up9	A	203	0	0	1
1up9	A	204	0	0	1
1urv	A	1172	0	1	0
1v4x	A	144	0	1	0
1v4x	B	347	0	1	0
1vgi	A	300	1	0	0
1vwt	A	201	0	1	0
1w7o	A	1119	0	0	1
1w7o	A	1120	0	0	1
1w7o	A	1121	0	0	1
1w7o	A	1122	0	0	1
1wad	A	117	0	0	1
1wad	A	113	0	0	1
1wad	A	114	0	0	1
1wad	A	115	0	0	1
1wiy	A	390	1	0	0
1wmu	A	201	0	1	0
1wmu	B	201	0	1	0
1wov	A	300	1	0	0
1wr5	A	1004	0	0	1
1wr5	A	1002	0	0	1
1wr5	A	1001	0	0	1
1wr5	A	1003	0	0	1
1wve	C	699	0	0	1
1x3k	A	1001	0	1	0
1x3x	A	201	0	0	1
1x46	A	151	0	1	0
1x8q	A	201	1	0	0
1x8v	A	470	1	0	0
1xch	A	154	0	1	0
1xq5	A	143	0	1	0
1xqd	A	501	1	0	0
1xy0	A	142	0	1	0
1xz4	A	142	0	1	0
1xz7	A	142	0	1	0
1y0p	A	801	1	0	0
1y0p	A	802	1	0	0
1y0p	A	803	1	0	0
1y0p	A	804	1	0	0
1y45	B	147	0	1	0
1y4g	B	147	0	1	0
1y4p	B	147	0	1	0
1y4v	B	147	0	1	0
1y5i	C	806	1	0	0
1y5i	C	807	1	0	0
1y7d	B	147	0	1	0
1y7z	B	147	0	1	0
1y83	B	147	0	1	0
1ycc	A	118	0	0	1
1yea	A	104	0	0	1
1yeb	A	104	0	0	1
1yma	A	154	0	1	0
1ytc	A	104	0	0	1
1z10	B	500	1	0	0
1z9n	A	1001	1	0	0
256b	A	109	0	0	1
2a3m	A	501	0	0	1
2a3m	A	502	0	0	1
2a3m	A	503	0	0	1
2a3m	A	504	0	0	1
2aa1	A	200	0	1	0
2aa1	B	400	0	1	0
2aiu	A	200	0	0	1
2aup	A	147	0	1	0
2av3	A	147	0	1	0
2b4z	A	500	0	0	1
2bcn	B	109	0	0	1
2bgv	X	1121	0	0	1
2bh4	X	1123	0	0	1
2bk9	A	1154	1	0	0
2blf	B	601	0	0	1
2boq	A	1320	1	0	0
2bq4	A	1115	0	0	1
2bq4	A	1116	0	0	1
2bq4	A	1117	0	0	1
2bq4	A	1118	0	0	1
2bs2	C	1255	0	0	1
2bs2	C	1256	0	0	1
2c1d	B	1158	0	0	1
2c1v	A	401	1	0	0
2c1v	A	402	1	0	0
2c8s	A	1173	0	0	1
2cca	A	1741	1	0	0
2cdv	A	108	0	0	1
2cdv	A	109	0	0	1
2cdv	A	110	0	0	1
2cdv	A	111	0	0	1
2ce0	A	1102	0	0	1
2ciw	A	1300	1	0	0
2cl4	X	251	1	0	0
2cth	A	109	0	0	1
2cth	A	110	0	0	1
2cth	A	111	0	0	1
2cth	A	112	0	0	1
2cvc	A	1001	0	0	1
2cvc	A	1002	0	0	1
2cvc	A	1003	0	0	1
2cvc	A	1004	0	0	1
2cvc	A	1005	0	0	1
2cvc	A	1006	0	0	1
2cvc	A	1007	0	0	1
2cvc	A	1008	0	0	1
2cvc	A	1009	0	0	1
2cvc	A	1010	0	0	1
2cvc	A	1011	0	0	1
2cvc	A	1012	0	0	1
2cvc	A	1013	0	0	1
2cvc	A	1014	0	0	1
2cvc	A	1015	0	0	1
2cvc	A	1016	0	0	1
2cy3	A	119	0	0	1
2cy3	A	120	0	0	1
2cy3	A	121	0	0	1
2cy3	A	122	0	0	1
2czs	A	500	0	0	1
2czs	A	501	0	0	1
2d0w	A	200	0	0	1
2dc3	A	191	0	1	0
2dge	A	200	0	0	1
2dn2	A	142	0	1	0
2dn2	B	147	0	1	0
2e2y	A	154	1	1	0
2eut	A	295	1	0	0
2ewi	A	1004	0	0	1
2ewi	A	1002	0	0	1
2ewi	A	1001	0	0	1
2ewi	A	1003	0	0	1
2ewk	A	1004	0	0	1
2ewk	A	1002	0	0	1
2ewk	A	1001	0	0	1
2ewk	A	1003	0	0	1
2ewu	A	1004	0	0	1
2ewu	A	1002	0	0	1
2ewu	A	1001	0	0	1
2ewu	A	1003	0	0	1
2exv	A	83	0	0	1
2fkz	B	3001	1	0	0
2fwt	A	803	0	0	1
2fwt	A	805	0	0	1
2gc7	D	200	0	0	1
2h88	C	142	0	0	1
2h8f	A	200	0	1	0
2h8f	B	400	0	1	0
2hbg	A	148	0	1	0
2hz1	A	125	0	1	0
2hz3	A	129	0	1	0
2ia8	A	296	1	0	0
2ibj	A	201	0	0	1
2ij2	A	999	1	0	0
2isa	A	486	1	0	0
2ivf	C	1217	1	0	0
2j8w	A	1129	0	0	1
2jjn	A	412	1	0	0
2mbw	A	154	0	1	0
2mgb	A	154	0	1	0
2mge	A	154	0	1	0
2mgg	A	154	0	1	0
2mgj	A	154	0	1	0
2nw8	A	401	1	0	0
2oh8	A	154	0	1	0
2oh9	A	154	0	1	0
2oha	A	154	0	1	0
2ohb	A	154	0	1	0
2p0b	A	201	0	0	1
2p0b	A	202	0	0	1
2p0b	A	203	0	0	1
2p0b	A	204	0	0	1
2p0b	A	205	0	0	1
2q9f	A	602	1	0	0
2qsp	A	142	0	1	0
2qsp	B	146	0	1	0
2r4y	A	147	0	1	0
2rdz	A	1	1	0	0
2rdz	A	2	1	0	0
2rdz	A	3	1	0	0
2rdz	A	4	1	0	0
2rdz	A	5	1	0	0
2spm	A	154	0	1	0
2spo	A	154	0	1	0
2uuq	A	1405	1	0	0
2v07	A	1102	0	0	1
2v08	A	1087	0	0	1
2v1i	A	1154	0	1	0
2v7i	A	1362	1	0	0
2vcs	A	1251	1	0	0
2vka	A	1320	1	0	0
2vnz	X	251	1	0	0
2w31	A	200	0	1	0
2w6x	A	1154	0	1	0
2w6y	A	1154	0	1	0
2w72	A	1142	0	1	0
2w72	B	1147	0	1	0
2w72	C	1142	0	1	0
2wiv	A	1553	1	0	0
2wjn	C	401	0	0	1
2wjn	C	402	0	0	1
2wjn	C	403	0	0	1
2wjn	C	404	0	0	1
2x07	A	1295	1	0	0
2xbk	A	1398	1	0	0
2xil	A	1301	1	0	0
2xki	A	1110	0	1	0
2xl8	A	1127	0	0	1
2xld	A	1127	0	0	1
2xlh	A	128	0	0	1
2xm0	A	1128	0	0	1
2xm4	A	128	0	0	1
2xts	B	500	0	0	1
2y3q	A	200	1	0	0
2y3q	B	200	1	0	0
2y5n	A	450	1	0	0
2y6b	A	251	1	0	0
2yk3	A	200	0	0	1
2ykz	A	128	0	0	1
2ylj	A	350	1	0	0
2yoo	A	1402	1	0	0
2yxc	A	1004	0	0	1
2yxc	A	1002	0	0	1
2yxc	A	1001	0	0	1
2yxc	A	1003	0	0	1
2yyw	A	1004	0	0	1
2yyw	A	1002	0	0	1
2yyw	A	1001	0	0	1
2yyw	A	1003	0	0	1
2yyx	A	1004	0	0	1
2yyx	A	1002	0	0	1
2yyx	A	1001	0	0	1
2yyx	A	1003	0	0	1
2z47	A	1004	0	0	1
2z47	A	1002	0	0	1
2z47	A	1001	0	0	1
2z47	A	1003	0	0	1
2z85	A	147	0	1	0
2zbo	A	111	0	0	1
2zby	A	413	1	0	0
2zdo	A	200	1	0	0
2zfo	B	200	0	1	0
2zfo	C	200	0	1	0
2zfo	D	200	0	1	0
2zon	G	200	0	0	1
2zoo	A	600	1	0	0
2zwu	A	417	1	0	0
2zxy	A	200	0	0	1
2zzs	1	220	0	0	1
3a2g	A	154	0	1	0
3a4g	A	412	1	0	0
3a9f	A	207	0	0	1
3aba	A	1408	1	0	0
3aq6	A	144	0	1	0
3aq7	A	144	0	1	0
3aq8	A	144	0	1	0
3aq9	A	144	0	1	0
3awm	A	501	1	0	0
3b4x	A	410	1	0	0
3bj1	A	143	0	1	0
3bj1	B	148	0	1	0
3bnj	A	514	1	0	0
3bnj	A	515	1	0	0
3bnj	A	516	1	0	0
3bnj	A	517	1	0	0
3bom	A	143	0	1	0
3bom	B	148	0	1	0
3bxu	A	72	0	0	1
3bxu	A	73	0	0	1
3bxu	A	74	0	0	1
3c2c	A	113	0	0	1
3c62	A	150	0	0	1
3c63	A	150	0	0	1
3cao	A	104	0	0	1
3cao	A	105	0	0	1
3cao	A	106	0	0	1
3cao	A	107	0	0	1
3cp5	A	202	0	0	1
3cu4	A	199	0	0	1
3cxv	A	462	1	0	0
3cxx	A	462	1	0	0
3cxy	A	462	1	0	0
3cxz	A	462	1	0	0
3cy0	A	462	1	0	0
3cy1	A	462	1	0	0
3cy5	A	142	0	1	0
3cy5	B	147	0	1	0
3cyr	A	201	0	0	1
3cyr	A	202	0	0	1
3cyr	A	203	0	0	1
3cyr	A	204	0	0	1
3d1k	B	400	0	1	0
3de8	A	150	0	0	1
3dhr	A	142	0	1	0
3dhr	B	147	0	1	0
3dmi	A	146	0	0	1
3dp5	A	122	0	0	1
3dut	B	150	0	1	0
3e2c	A	203	1	0	0
3e2n	A	296	1	0	0
3e2o	A	296	1	0	0
3e4w	A	501	1	0	0
3e7m	A	901	1	0	0
3egw	C	806	1	0	0
3egw	C	807	1	0	0
3ejb	B	405	1	0	0
3fm6	A	350	1	0	0
3fmu	A	350	1	0	0
3fo3	A	1005	1	0	0
3fo3	A	1006	1	0	0
3fo3	A	1007	1	0	0
3fo3	A	1008	1	0	0
3fo3	A	1002	1	0	0
3fo3	A	1003	1	0	0
3fo3	A	1001	1	0	0
3fwg	A	417	1	0	0
3g1q	A	480	1	0	0
3gdj	A	142	0	1	0
3gdj	B	147	0	1	0
3gqp	A	143	0	1	0
3gqp	B	148	0	1	0
3h34	A	72	0	0	1
3h34	A	73	0	0	1
3h34	A	74	0	0	1
3h4n	A	72	0	0	1
3h4n	A	73	0	0	1
3h4n	A	74	0	0	1
3h57	A	154	0	1	0
3hc9	A	154	0	1	0
3hen	A	154	0	1	0
3hnj	A	150	0	0	1
3hq9	A	401	1	0	0
3hx9	A	300	1	0	0
3hyu	A	142	0	1	0
3hyu	B	147	0	1	0
3ivy	A	501	1	0	0
3k3u	A	139	1	1	0
3lb2	A	139	1	1	0
3lf5	A	1	1	0	0
3lgm	A	200	1	0	0
3m3a	A	155	1	1	0
3m4c	A	150	0	0	1
3m5q	A	396	1	0	0
3m97	X	141	0	0	1
3mkb	A	141	0	1	0
3mkb	B	137	0	1	0
3ml1	B	1128	0	0	1
3ml1	B	1129	0	0	1
3mvc	A	500	0	1	0
3ner	A	201	0	0	1
3nmm	A	142	0	1	0
3nt1	A	619	1	0	0
3nwv	A	105	0	0	1
3o5c	A	401	1	0	0
3o5c	A	501	1	0	0
3o89	A	2154	1	1	0
3oa8	B	401	0	0	1
3oft	A	417	1	0	0
3ogb	A	154	0	1	0
3oj1	A	139	1	1	0
3orv	A	500	1	0	0
3orv	A	600	1	0	0
3ozz	B	201	0	0	1
3p3o	A	501	1	0	0
3pel	A	142	0	1	0
3psx	A	482	1	0	0
3q3u	A	338	1	0	0
3qjd	A	142	0	1	0
3qje	B	147	0	1	0
3qm6	A	201	0	1	0
3qns	A	351	1	0	0
3qqq	A	163	0	1	0
3qw0	A	150	0	0	1
3qzx	A	200	0	1	0
3r9b	A	501	1	0	0
3rgk	A	154	0	1	0
3rj6	A	154	0	1	0
3rmz	A	500	1	0	0
3rmz	A	600	1	0	0
3rwl	A	417	1	0	0
3sj0	X	72	0	0	1
3sj0	X	73	0	0	1
3sj0	X	74	0	0	1
3sj1	X	72	0	0	1
3sj1	X	73	0	0	1
3sj1	X	74	0	0	1
3sj4	X	72	0	0	1
3sj4	X	73	0	0	1
3sj4	X	74	0	0	1
3sjl	A	500	1	0	0
3sjl	A	600	1	0	0
3sxq	A	1004	1	0	0
3sxq	A	1005	1	0	0
3sxq	A	1006	1	0	0
3sxq	A	1007	1	0	0
3sxq	A	1008	1	0	0
3sxq	A	1002	1	0	0
3sxq	A	1003	1	0	0
3sxq	A	1001	1	0	0
3t6d	C	401	0	0	1
3t6d	C	402	0	0	1
3t6d	C	403	0	0	1
3t6d	C	404	0	0	1
3tga	A	185	1	0	0
3tld	A	201	0	1	0
3tm3	A	201	0	1	0
3tm9	A	201	0	1	0
3tol	A	150	0	0	1
3ttv	A	760	1	0	0
3u99	A	500	0	0	1
3u99	A	700	0	0	1
3ucp	A	901	0	0	1
3ucp	A	902	0	0	1
3ucp	A	903	0	0	1
3ucp	A	904	0	0	1
3ucp	A	905	0	0	1
3ucp	A	906	0	0	1
3ucp	A	907	0	0	1
3ucp	A	908	0	0	1
3ucp	A	909	0	0	1
3ucp	A	910	0	0	1
3ucp	A	911	0	0	1
3uhk	A	147	0	1	0
3uhn	A	147	0	1	0
3uhq	A	147	0	1	0
3uhr	A	147	0	1	0
3uht	A	147	0	1	0
3uhv	A	147	0	1	0
3uhx	A	147	0	1	0
3uhz	A	147	0	1	0
3ui0	A	147	0	1	0
3uoi	B	200	1	0	0
3v8d	A	601	1	0	0
3vlh	A	800	1	0	0
3vrc	A	200	0	0	1
3vrd	A	201	0	0	1
3vrd	A	202	0	0	1
3vrg	A	201	0	1	0
3vrg	B	201	0	1	0
3vxj	A	501	1	0	0
3wvs	A	501	1	0	0
3wyo	A	201	0	1	0
3wyo	B	201	0	1	0
3x34	A	101	0	0	1
3zcf	A	105	0	0	1
3ziy	A	600	1	0	0
3zoo	A	105	0	0	1
3zpi	A	1407	1	0	0
4a71	A	1295	1	0	0
4aan	A	400	1	0	0
4aan	A	401	1	0	0
4aj9	A	1715	1	0	0
4am5	A	1160	1	0	0
4b2n	A	701	0	0	1
4b7g	A	3000	1	0	0
4b8n	A	201	0	0	1
4bja	A	300	0	1	0
4blk	A	500	1	0	0
4bm1	A	500	1	0	0
4c9p	A	422	1	0	0
4ccx	A	295	1	0	0
4czq	A	1372	1	0	0
4d1p	A	500	1	0	0
4d7j	A	901	1	0	0
4dnj	A	501	1	0	0
4dty	A	500	1	0	0
4dua	A	500	1	0	0
4dud	A	500	1	0	0
4dxy	A	501	1	0	0
4eic	A	101	0	0	1
4eid	A	101	0	0	1
4eie	A	101	0	0	1
4eif	A	101	0	0	1
4ek1	A	501	1	0	0
4f6b	A	201	0	1	0
4f6g	A	201	0	1	0
4fb2	A	501	1	0	0
4fcn	A	403	1	0	0
4fnh	A	200	1	0	0
4fvc	A	201	1	0	0
4fwy	A	201	1	1	0
4fwz	A	201	1	1	0
4ged	B	201	0	0	1
4gyd	A	200	0	0	1
4h0j	A	200	0	0	1
4h0k	A	200	0	0	1
4h2l	A	201	0	1	0
4h2l	B	201	0	1	0
4haj	A	72	0	0	1
4haj	A	73	0	0	1
4haj	A	74	0	0	1
4hb6	A	72	0	0	1
4hb6	A	73	0	0	1
4hb6	A	74	0	0	1
4hb8	A	72	0	0	1
4hb8	A	73	0	0	1
4hb8	A	74	0	0	1
4hbf	A	72	0	0	1
4hbf	A	73	0	0	1
4hbf	A	74	0	0	1
4hbi	A	153	0	1	0
4hc3	A	72	0	0	1
4hc3	A	73	0	0	1
4hc3	A	74	0	0	1
4hdl	A	72	0	0	1
4hdl	A	73	0	0	1
4hdl	A	74	0	0	1
4hhs	A	701	1	0	0
4hil	A	101	0	0	1
4hrt	A	201	0	1	0
4hrt	B	201	0	1	0
4hsx	A	201	1	1	0
4it8	A	201	1	1	0
4j20	A	107	0	0	1
4j6c	A	502	1	0	0
4jcg	A	101	0	0	1
4jea	A	201	0	0	1
4jj0	A	501	0	0	1
4jj0	A	502	0	0	1
4kky	X	501	1	0	0
4kmg	A	101	0	0	1
4kmw	A	201	1	1	0
4kn3	A	201	1	1	0
4kvk	A	701	1	0	0
4l0f	A	501	1	0	0
4l3h	A	402	1	0	0
4l3h	A	403	1	0	0
4lji	A	301	0	0	1
4lm8	A	801	1	0	0
4lm8	A	802	1	0	0
4lm8	A	803	1	0	0
4lm8	A	804	1	0	0
4lm8	A	805	1	0	0
4lm8	A	806	1	0	0
4lm8	A	807	1	0	0
4lm8	A	808	1	0	0
4lm8	A	809	1	0	0
4lm8	A	810	1	0	0
4lpi	A	201	1	1	0
4max	A	201	0	1	0
4mpm	A	201	0	1	0
4mqi	B	201	0	1	0
4mqj	B	201	0	1	0
4msf	A	601	1	0	0
4mu5	A	201	0	1	0
4mu8	A	201	0	0	1
4n0k	A	201	0	0	1
4n4j	A	609	1	0	0
4n4j	A	610	1	0	0
4n4j	A	611	1	0	0
4n4j	A	612	1	0	0
4n4j	A	613	1	0	0
4n4j	A	614	1	0	0
4n4j	A	615	1	0	0
4n4j	A	616	1	0	0
4ns2	A	202	0	1	0
4o1t	A	201	0	1	0
4o1w	A	101	0	0	1
4of9	A	201	1	1	0
4ood	A	201	1	1	0
4oqr	A	501	1	0	0
4pq6	A	201	1	1	0
4pqb	A	201	1	1	0
4pqc	A	201	1	1	0
4q5p	A	201	0	0	1
4qau	A	201	1	1	0
4qi3	A	401	0	0	1
4qol	A	501	1	0	0
4rm4	A	401	1	0	0
4sdh	A	147	0	1	0
4toa	B	209	1	0	0
4tob	B	201	1	0	0
4tpn	A	501	1	0	0
4tvf	A	401	1	0	0
4tyx	A	201	1	1	0
4ulv	A	129	0	0	1
4v2k	A	600	1	0	0
4w7l	A	501	1	0	0
4w7o	A	501	1	0	0
4wgz	A	201	0	0	1
4wqd	A	1001	1	0	0
4wqd	A	1002	1	0	0
4xdi	A	201	1	0	0
4xmh	A	201	1	0	0
4xxl	A	201	0	0	1
4ybn	A	304	1	0	0
4ybn	B	301	1	0	0
4ye1	A	201	0	0	1
4yt3	A	501	1	0	0
4yzr	A	502	1	0	0
4z5p	A	401	1	0	0
4z5q	A	401	1	0	0
5abo	A	500	1	0	0
5al9	A	305	1	0	0
5aog	A	1341	1	0	0
5aur	A	101	0	0	1
5aur	C	101	0	0	1
5awi	A	201	0	0	1
5b3i	A	201	0	0	1
5b66	E	104	0	0	1
5b72	A	820	1	0	0
5b84	A	201	1	1	0
5b85	A	201	1	1	0
5c0z	A	201	0	0	1
5c2i	A	501	1	0	0
5c9m	A	201	0	0	1
5cyt	R	105	0	0	1
5d1v	A	201	1	0	0
5d8x	A	201	1	0	0
5df5	A	201	0	0	1
5dfs	A	201	0	0	1
5e78	A	501	1	0	0
5eui	A	201	0	1	0
5eui	B	201	0	1	0
5ev5	A	201	0	1	0
5fnb	A	500	1	0	0
5fne	A	500	1	0	0
5gxg	A	501	1	0	0
5gyr	A	201	0	0	1
5hdi	A	501	1	0	0
5hiw	A	401	1	0	0
5hlu	A	201	1	1	0
5jhx	A	801	1	0	0
5jp7	A	201	0	0	1
5jq2	A	501	1	0	0
5jsl	A	201	0	0	1
5jt4	A	201	0	0	1
5jve	A	1101	0	0	1
5jxu	A	501	1	0	0
5kyo	A	501	1	0	0
5kzl	A	301	1	0	0
5lie	B	501	1	0	0
5lk9	A	201	1	1	0
5lte	A	501	1	0	0
5m0n	A	501	1	0	0
5m6j	A	201	1	0	0
5mau	A	201	1	0	0
5mfa	A	812	1	0	0
5mxy	A	200	0	0	1
5mxz	A	200	0	0	1
5ncb	A	501	1	0	0
5o10	A	201	0	0	1
5oc0	A	201	0	0	1
5oc0	A	202	0	0	1
5sxw	A	801	1	0	0
5twt	A	301	1	0	0
5ty3	A	201	0	0	1
5ucw	A	501	1	0	0
5ufg	A	501	1	0	0
5ut8	A	201	0	1	0
5utb	A	201	0	1	0
5vcc	A	601	1	0	0
5vcd	A	601	1	0	0
5via	A	500	1	0	0
5vj0	A	500	1	0	0
5vlx	A	201	1	1	0
5vnu	A	201	1	1	0
5xec	C	101	0	0	1
5xec	C	102	0	0	1
5xed	C	101	0	0	1
5xjn	A	502	1	0	0
5xkv	A	201	1	1	0
5xkw	A	201	1	1	0
5xw2	A	401	1	0	0
5xzj	A	201	0	0	1
5y1i	A	501	1	0	0
5y5s	C	501	0	0	1
5y5s	C	502	0	0	1
5y5s	C	503	0	0	1
5y5s	C	504	0	0	1
5yce	A	201	0	1	0
5ych	A	201	0	1	0
5yci	A	201	0	1	0
5yem	A	704	1	0	0
5ylw	A	501	1	0	0
5ysm	A	501	1	0	0
5yzf	A	201	1	1	0
5z25	A	101	0	0	1
5z7e	A	204	0	1	0
5z9j	A	401	1	0	0
5zeo	A	201	1	1	0
5ziq	A	1001	0	1	0
5zzf	A	201	1	1	0
6a15	A	601	1	0	0
6a3k	A	201	0	0	1
6a6q	A	401	1	0	0
6ai5	A	201	0	0	1
6amg	A	201	1	0	0
6b11	A	501	1	0	0
6bld	A	501	1	0	0
6bme	A	201	0	1	0
6cid	A	801	1	0	0
6cuk	A	201	0	0	1
6d45	A	201	1	1	0
6dcd	A	501	1	0	0
6ds7	A	201	1	0	0
6duj	A	201	0	0	1
6dy6	A	203	0	0	1
6dy8	A	201	0	0	1
6dyc	A	202	0	0	1
6dyf	A	201	0	0	1
6dyi	B	202	0	0	1
6e0x	A	201	1	0	0
6e44	A	501	1	0	0
6ekx	A	401	1	0	0
6f8a	A	501	1	0	0
6fiy	A	401	1	0	0
6fks	A	401	1	0	0
6fsk	A	501	1	0	0
6fu3	A	402	1	0	0
6fu3	A	403	1	0	0
6fyj	A	502	1	0	0
6gd6	A	201	0	0	1
6gk5	A	501	1	0	0
6gmf	A	501	1	0	0
6gzw	A	501	1	0	0
6h5z	A	201	0	1	0
6h6i	A	201	0	1	0
6hbi	A	153	0	1	0
6hbw	B	153	0	1	0
6hih	A	203	1	0	0
6hiu	A	201	1	0	0
6hqd	A	501	1	0	0
6hr0	A	101	0	0	1
6hr0	A	102	0	0	1
6hr0	A	103	0	0	1
6hr0	A	104	0	0	1
6i8o	A	501	1	0	0
6iss	A	401	1	0	0
6iyh	A	201	0	1	0
6iyh	B	201	0	1	0
6j83	A	401	1	0	0
6jp1	A	201	1	1	0
6jt6	A	302	1	0	0
6k7c	A	101	0	0	1
6k7c	C	101	0	0	1
6k9j	A	201	0	0	1
6kfw	A	501	1	0	0
6kq1	A	103	0	0	1
6krc	A	201	1	1	0
6l8h	A	601	1	0	0
6l8i	A	601	1	0	0
6lde	A	201	0	0	1
6ldg	A	201	0	0	1
6ldl	A	501	1	0	0
6ltl	A	201	0	1	0
6ltl	B	201	0	1	0
6ltm	A	201	0	1	0
6ltm	B	201	0	1	0
6m0q	A	601	1	0	0
6m0q	A	602	1	0	0
6m0q	A	603	1	0	0
6m0q	A	604	1	0	0
6m0q	A	605	1	0	0
6m0q	A	606	1	0	0
6m0q	A	607	1	0	0
6m4q	A	501	1	0	0
6m4s	A	509	1	0	0
6myu	C	201	0	0	1
6n1o	A	201	0	0	1
6ngm	A	801	1	0	0
6nlg	A	202	1	0	0
6nx0	A	601	1	0	0
6nx0	A	602	1	0	0
6nzx	A	101	0	0	1
6o0a	A	402	1	0	0
6p43	A	301	1	0	0
6p43	B	201	0	0	1
6p73	A	501	1	0	0
6p73	A	502	1	0	0
6p73	A	503	1	0	0
6p73	A	504	1	0	0
6p73	A	505	1	0	0
6po0	A	601	1	0	0
6q2c	A	501	1	0	0
6q2u	A	201	0	0	1
6q2u	A	202	0	0	1
6r6m	A	200	0	0	1
6r6m	B	200	0	0	1
6r6n	A	200	0	0	1
6r6n	B	200	0	0	1
6r6o	A	200	0	0	1
6rjr	A	601	1	0	0
6rte	A	501	1	0	0
6sva	A	201	0	1	0
6t0h	A	501	1	0	0
6tpo	A	903	1	0	0
6tr1	A	101	0	0	1
6tr1	C	101	0	0	1
6tr1	E	101	0	0	1
6u97	A	202	0	0	1
6uez	A	601	1	0	0
6vdq	A	401	1	0	0
6vza	A	405	1	0	0
6vzb	A	404	1	0	0
6xal	A	801	1	0	0
6y2y	A	301	1	0	0
6yrj	A	401	1	0	0
6zmx	A	201	0	1	0
6zmx	B	201	0	1	0
7aba	B	501	1	0	0
7abb	A	501	1	0	0
7acp	A	201	1	1	0
7ant	B	501	1	0	0
7asb	A	204	1	0	0
7ati	A	202	1	0	0
7biu	A	301	1	0	0
7bwh	A	201	0	0	1
7cez	A	201	0	1	0
7cka	A	702	1	0	0
7cl8	A	501	1	0	0
7d8m	A	601	1	0	0
7d9f	A	702	1	0	0
7ddu	A	201	0	1	0
7de5	A	601	1	0	0
7di3	A	401	1	0	0
7dlh	A	401	1	0	0
7dy3	A	201	0	1	0
7dy4	A	201	0	1	0
7e5q	A	401	1	0	0
7ead	A	201	0	0	1
7ehx	A	201	0	1	0
7kqs	A	401	1	0	0
7kyr	A	201	1	1	0
7l3u	A	201	1	1	0
7ljx	A	201	0	0	1
7mnh	A	201	1	1	0
7o7g	A	801	0	0	1
7o7g	A	802	0	0	1
7o7g	A	803	0	0	1
7o7g	A	804	0	0	1
7o7g	A	805	0	0	1
7o7g	A	806	0	0	1
7o7g	A	807	0	0	1
7o7g	A	808	0	0	1
7o7g	A	809	0	0	1
7o7g	A	810	0	0	1
7ohd	A	201	0	1	0
7oo5	A	401	1	0	0
7oq6	B	501	1	0	0
7oqr	A	401	1	0	0
7ow9	A	803	1	0	0
7owi	A	501	1	0	0
7r8t	A	501	1	0	0
7s10	A	301	1	0	0
7spe	A	201	0	1	0
7spg	A	201	0	1	0
7tlx	1	201	0	0	1
7tto	A	401	1	0	0
7v43	A	502	1	0	0
7v5q	A	201	0	1	0
7v5r	A	201	0	1	0
7v5r	B	201	0	1	0
7wex	A	401	1	0	0
7zcl	B	302	1	0	0
7zos	A	201	0	1	0
